# Supplementary material for: Microtubule stabilization targeting regenerative chondrocyte cluster for cartilage regeneration
Source: PubMed Central journal article supplement (PMC10283062; doi:10.7150/thno.85077), 2023-06-12
Supplement: thnov13p3480s1.pdf [file thnov13p3480s1.pdf]

# Supplementary information

1

2

3

**Microtubule stabilization targeting regenerative chondrocyte cluster for cartilage**

4

**regeneration**

5

Jiawei Li<sup>1,3†</sup>, Chunmei Fan<sup>2,4,5,8,9†</sup>, Zhongyang Lv<sup>1†</sup>, Ziyang Sun<sup>1</sup>, Jie Han<sup>2,5,8,9</sup>, Maochun Wang<sup>1</sup>, Huiming Jiang<sup>6</sup>,

6

Kuoyang Sun<sup>1</sup>, Guihua Tan<sup>1</sup>, Hu Guo<sup>1</sup>, Anlong Liu<sup>1</sup>, Heng Sun<sup>1</sup>, Xingquan Xu<sup>1</sup>, Rui Wu<sup>1</sup>, Wenjin Yan<sup>1</sup>, Qing

7

Jiang<sup>1</sup>, Shiro Ikegawa<sup>1,7</sup>, Xiao Chen<sup>2,4,8,9\*</sup>, Dongquan Shi<sup>1,9\*</sup>

8

9

|                 | Patient 1     | Patient 2     | Patient 3    |
|-----------------|---------------|---------------|--------------|
| Diagnose        | Right knee OA | Right knee OA | Left knee OA |
| Gender          | Male          | Female        | Female       |
| Age (years old) | 82            | 64            | 75           |
| Weight (kg)     | 74            | 58            | 54           |

7 **Table S1.** The information of human OA cartilage samples for Single-cell RNA sequence.

8

9

|                |                |                                 |   |
|----------------|----------------|---------------------------------|---|
| <i>SOX9</i>    | Forward primer | 5'-AGCGAACGCACATCAAGAC-3'       | 1 |
|                | Reverse primer | 5'-CTGTAGGCGATCTGTTGGGG-3'      |   |
| <i>COL2A1</i>  | Forward primer | 5'-CCAGATGACCTTCCTACGCC-3'      |   |
|                | Reverse primer | 5'- TTCAGGGCAGTGTACGTGAAC-3'    |   |
| <i>RUNX2</i>   | Forward primer | 5'- TGGTACTGTCATGGCGGGTA-3'     |   |
|                | Reverse primer | 5'- TCTCAGATCGTTGAACCTTGCTA-3'  |   |
| <i>COL1A1</i>  | Forward primer | 5'- GAGGGCCAAGACGAAGACATC-3'    |   |
|                | Reverse primer | 5'- CAGATCACGTCATCGCACAAAC-3'   |   |
| <i>COL10A1</i> | Forward primer | 5'- ATGCTGCCACAAATACCCTTT-3'    |   |
|                | Reverse primer | 5'- GGTAGTGGGCCTTTTATGCCT-3'    |   |
| <i>MST1</i>    | Forward primer | 5'- CAGAGCTGCGGCATCAAATC-3'     |   |
|                | Reverse primer | 5'- ACCTTGGTCGAGGAACTTGC-3'     |   |
| <i>MST2</i>    | Forward primer | 5'- TCTGAGATTGTGGAGGCCATTC-3'   |   |
|                | Reverse primer | 5'- GCTCCGTTCCCTAAGGCAGAT-3'    |   |
| <i>LATS1</i>   | Forward primer | 5'- CTGCTCTCCCCTCCAGAGTTA-3'    |   |
|                | Reverse primer | 5'- TGGCAGGAAAGGTCTTAGGC-3'     |   |
| <i>LATS2</i>   | Forward primer | 5'- TGCCAACAATGTAGCGAATGT-3'    |   |
|                | Reverse primer | 5'- TTGAAGATTATCACTCTCTCCAGG-3' |   |
| <i>RHOA</i>    | Forward primer | 5'- GATTGGCGCTTTTGGGTACAT-3'    |   |
|                | Reverse primer | 5'- AGCAGCTCTCGTAGCCATTTC-3'    |   |
| <i>ROCK1</i>   | Forward primer | 5'- AAGAGGGCATTGTCACAGCA-3'     |   |
|                | Reverse primer | 5'- AGCATCCAATCCATCCAGCA-3'     |   |
| <i>ROCK2</i>   | Forward primer | 5'- CCCGATAACCACCCCTCTTC-3'     |   |
|                | Reverse primer | 5'- TGCCTTGTGACGAACCAACTG-3'    |   |
| <i>GAPDH</i>   | Forward primer | 5'-ACAACCTTTGGTATCGTGAAGG-3'    |   |
|                | Reverse primer | 5'- GCCATCACGCCACAGTTTC-3'      |   |

2 **Table.S2** The primer sequences used in RT-PCR analysis

3

| Primary Antibody                                       | Concentration | Supplier                               |
|--------------------------------------------------------|---------------|----------------------------------------|
| For Western blot                                       |               |                                        |
| Ace-tubulin                                            | 1:1000        | Cell Signaling Technology, Boston, USA |
| Col II                                                 | 1:5000        | Abcam, Cambridge, UK                   |
| CD79B                                                  | 1:500         | Proteintech, Wuhan, China              |
| SMAD3                                                  | 1:1000        | Cell Signaling Technology              |
| Phosphorylated SMAD3                                   | 1:1000        | Cell Signaling Technology              |
| YAP                                                    | 1:1000        | Cell Signaling Technology              |
| Phosphorylated YAP                                     | 1:1000        | Cell Signaling Technology              |
| GAPDH                                                  | 1:1000        | Cell Signaling Technology              |
| For Immunofluorescent and immunohistochemical staining |               |                                        |
| Col II                                                 | 1:500.        | Abcam                                  |
| Col I                                                  | 1:300         | Boster, Wuhan, China                   |
| Ace-tubulin                                            | 1:500         | Cell Signaling Technology              |
| TGF- $\beta$ 1                                         | 1:200         | Proteintech                            |
| CHI3L1                                                 | 1:200         | Proteinech                             |
| YAP                                                    | 1:500         | Cell Signaling Technology              |

**Table.S3** The information of primary antibody used in western blot and histological analysis.

1  
2  
3  
4  
5  
6

1 Fig. S1

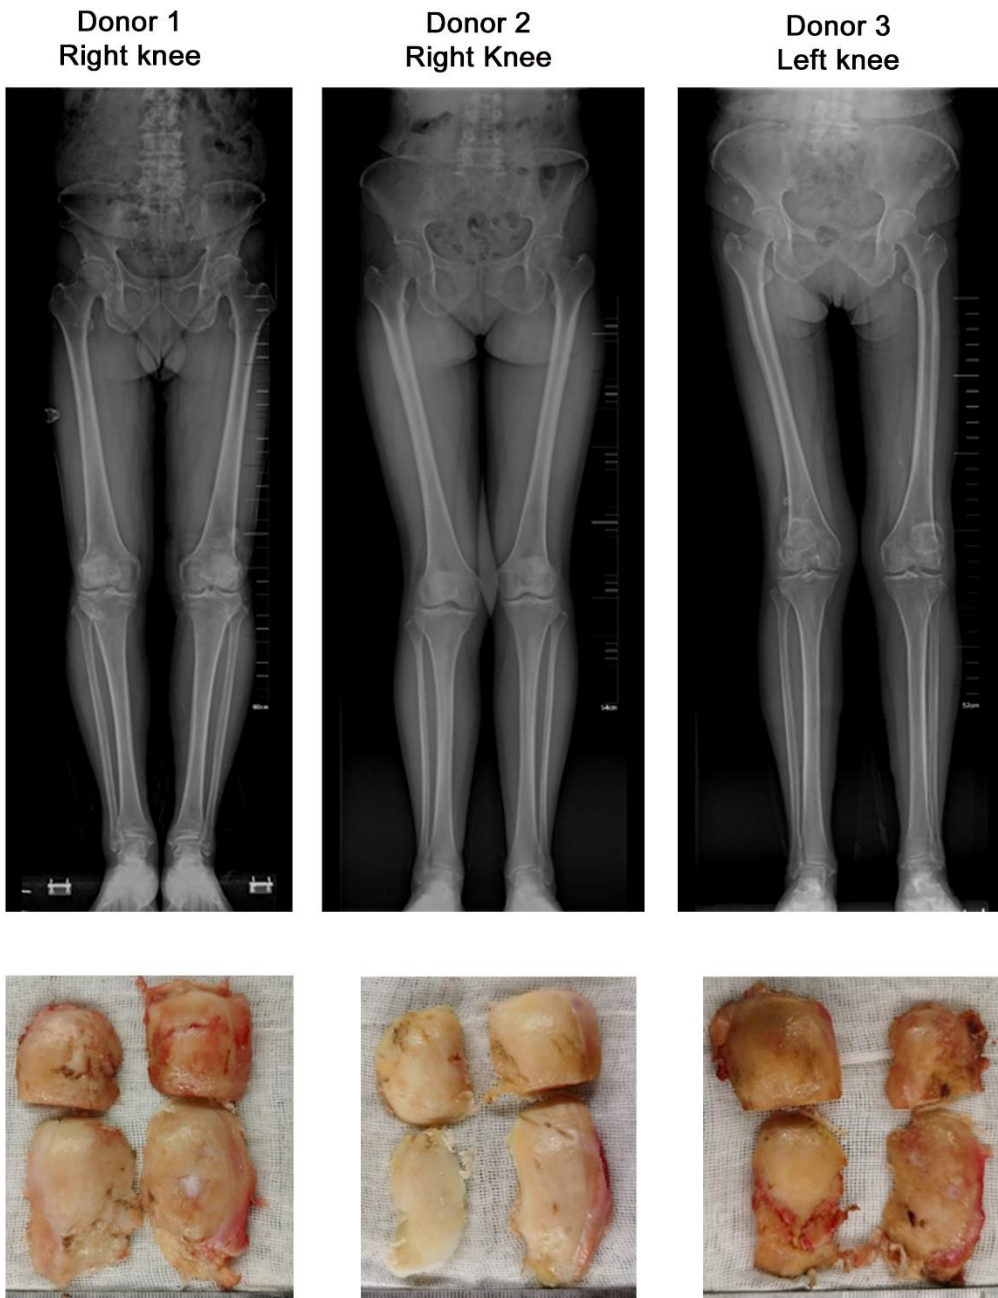

2

3 Fig.S1. The radiographic images and general view of the osteoarthritic cartilage form 3 donors

4

5

1 Fig.S2

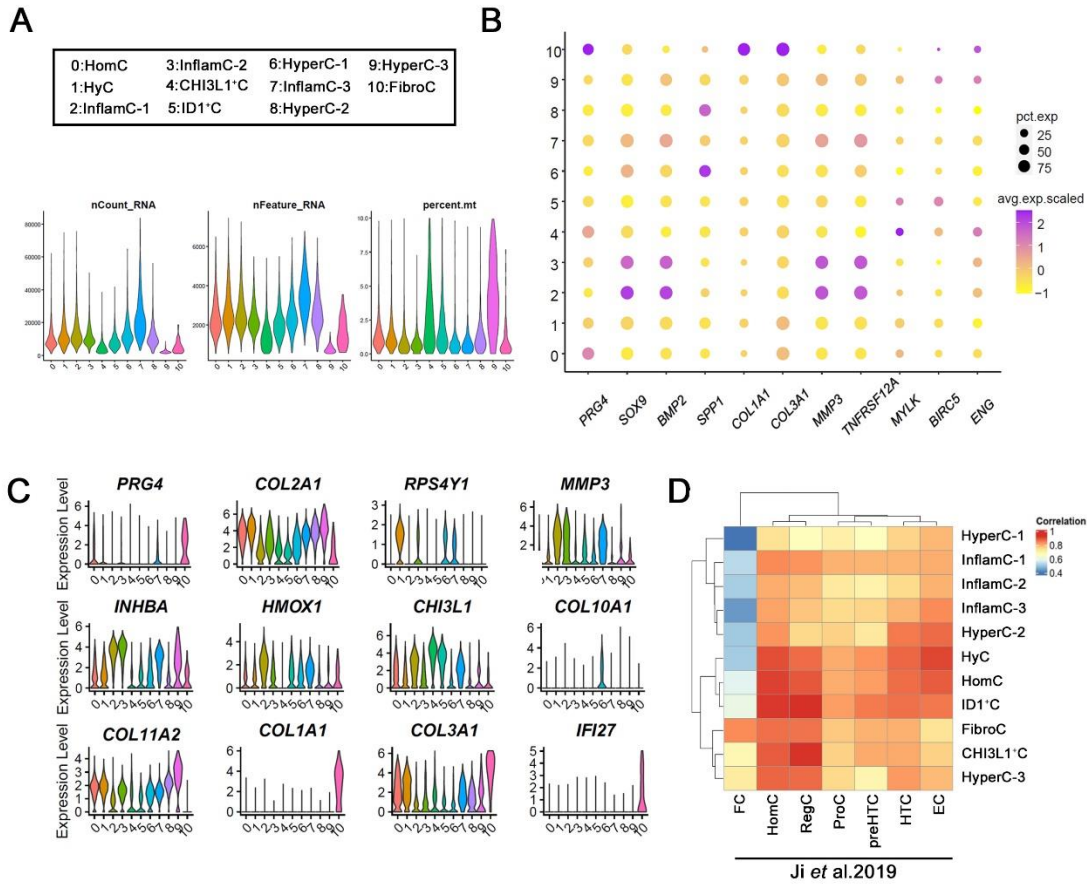

2

3 **Fig S2. Single-cell atlas of human articular chondrocyte.**

4 **(A)** Violin plots showing the distribution of the total counts, number of the genes, and the  
5 percentage of mitochondrial genes per cell cluster. The CHs clusters represented by number were  
6 listed at the right panel. **(B)** Dot plot showing the expression of the representative lineage-related  
7 genes of each cluster. **(C)** Violin plots showing expression levels of the represented marker genes  
8 of chondrocyte (CH) clusters. **(D)** Heatmap showing pairwise Pearson correlations in the global  
9 transcriptome between CHs in this study and articular chondrocytes based on the research of Ji *et*  
10 al(4). FC: fibrocartilage chondrocyte, HomC: homeostatic chondrocyte, HTC: hypertrophic  
11 chondrocyte, preHTC: prehypertrophic chondrocyte, ProC: proliferative chondrocyte, RegC:  
12 regulatory chondrocyte, EC: effector chondrocyte.

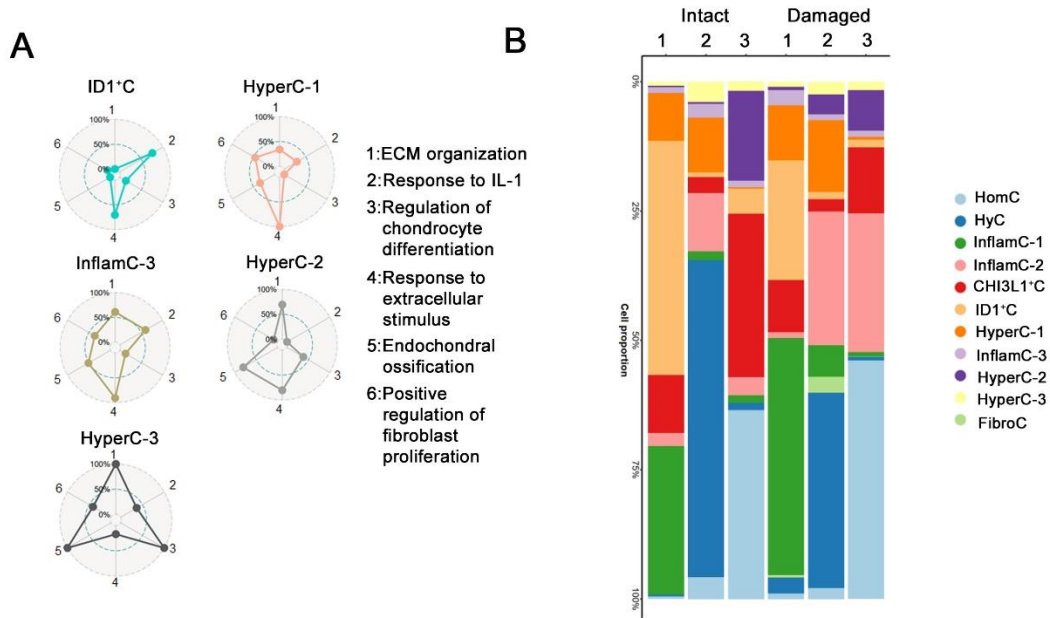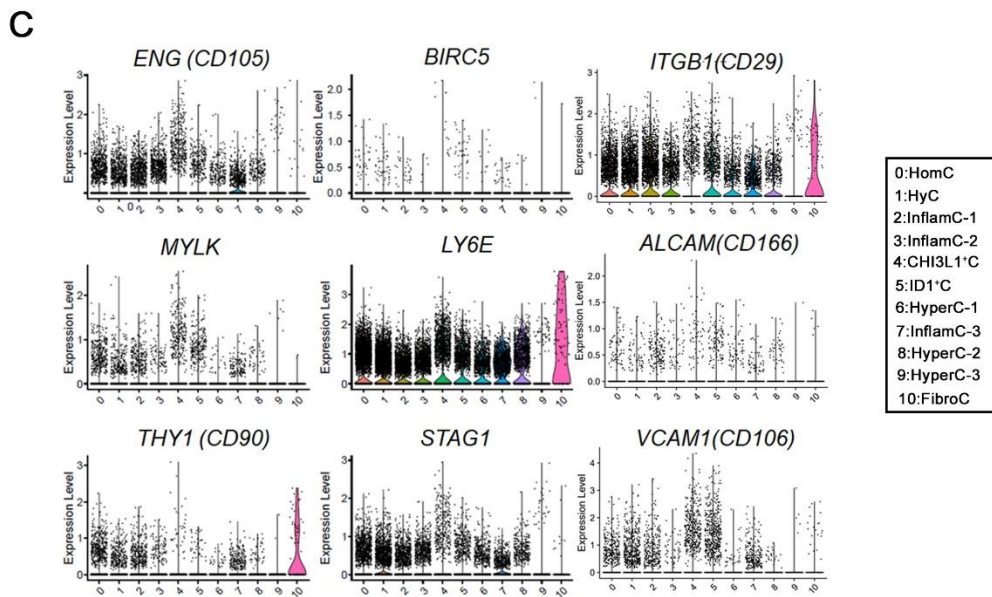

1 **Fig S3. Proportion of the subpopulation in human articular chondrocyte and the stem cell**  
2 **genes expression in each cluster.**

3 **(A)** Radar map showing the performance of six gene sets associated with the indicated function  
4 among each chondrocyte (ID1<sup>+</sup>C, HyperC-1, Inflamm-3, HyperC-2, and HyperC-3). **(B)** Cell  
5 proportion of each cell clusters in each human cartilage samples. **(C)** Violin plots showing  
6 expression levels of the represented stem cell related genes of each CH cluster.

7



1 Fig.S4

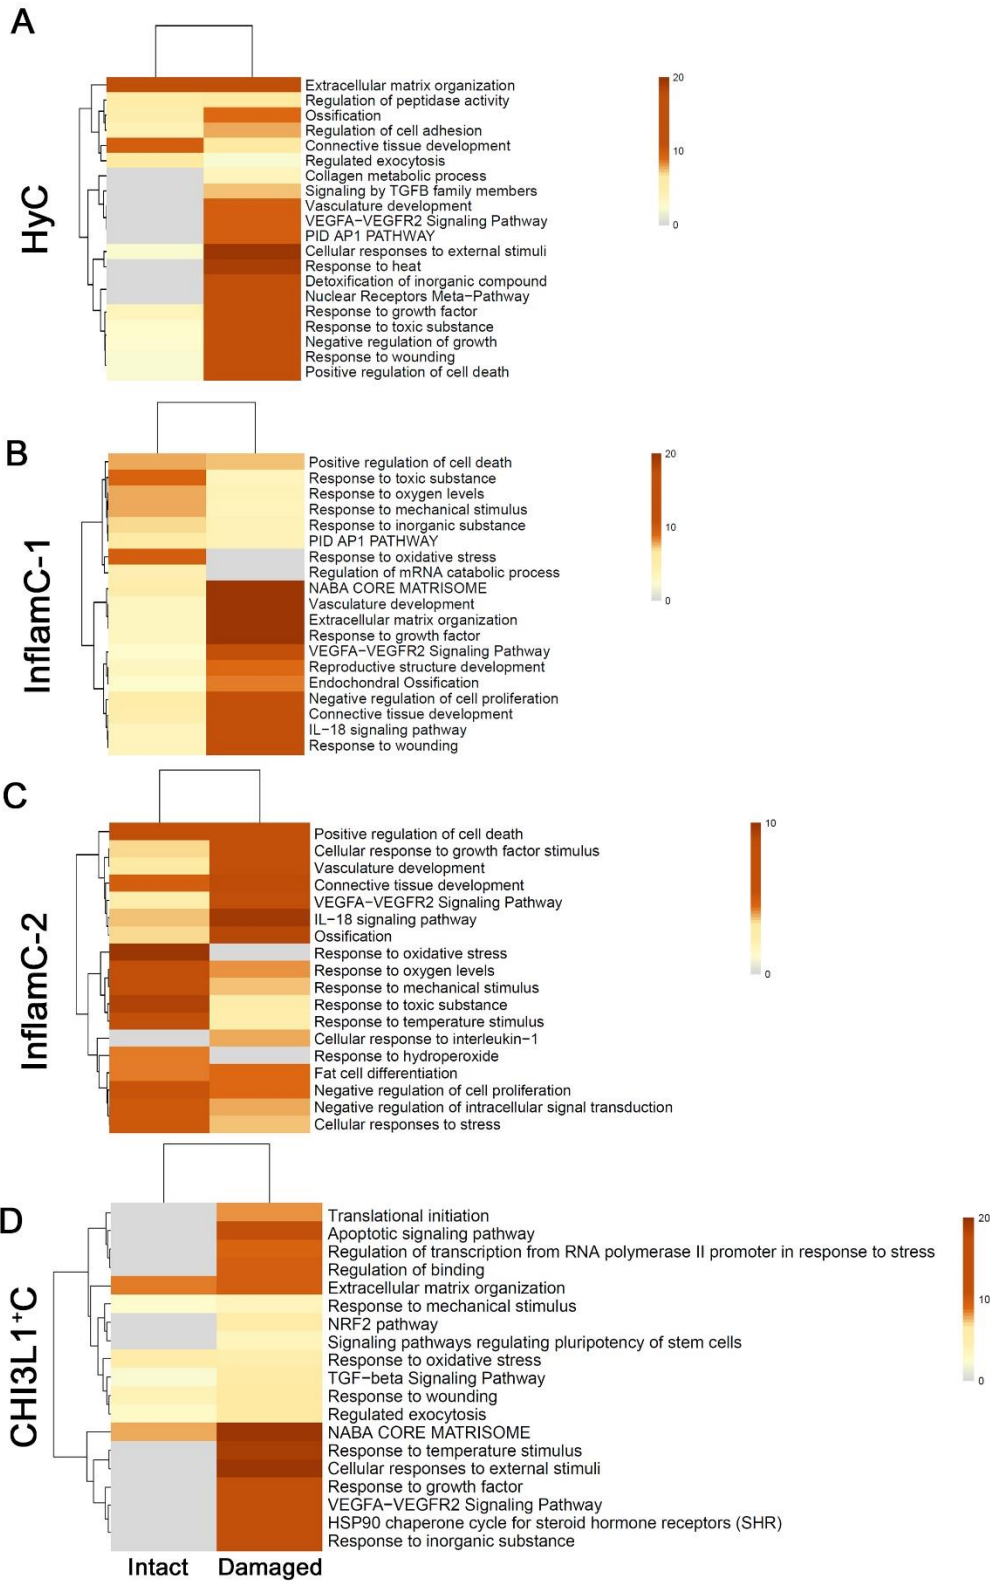

2

1 **Fig S4. Enriched Gene Ontology terms of chondrocytes**  
2 **(A-D)** Heatmap showing the enriched Gene Ontology( (biological processes) ) terms of DEGs  
3 between intact and damaged chondrocytes of HyC(A), InflammC-1(B), InflammC-2(C), and  
4 ReRegC (D).  
5

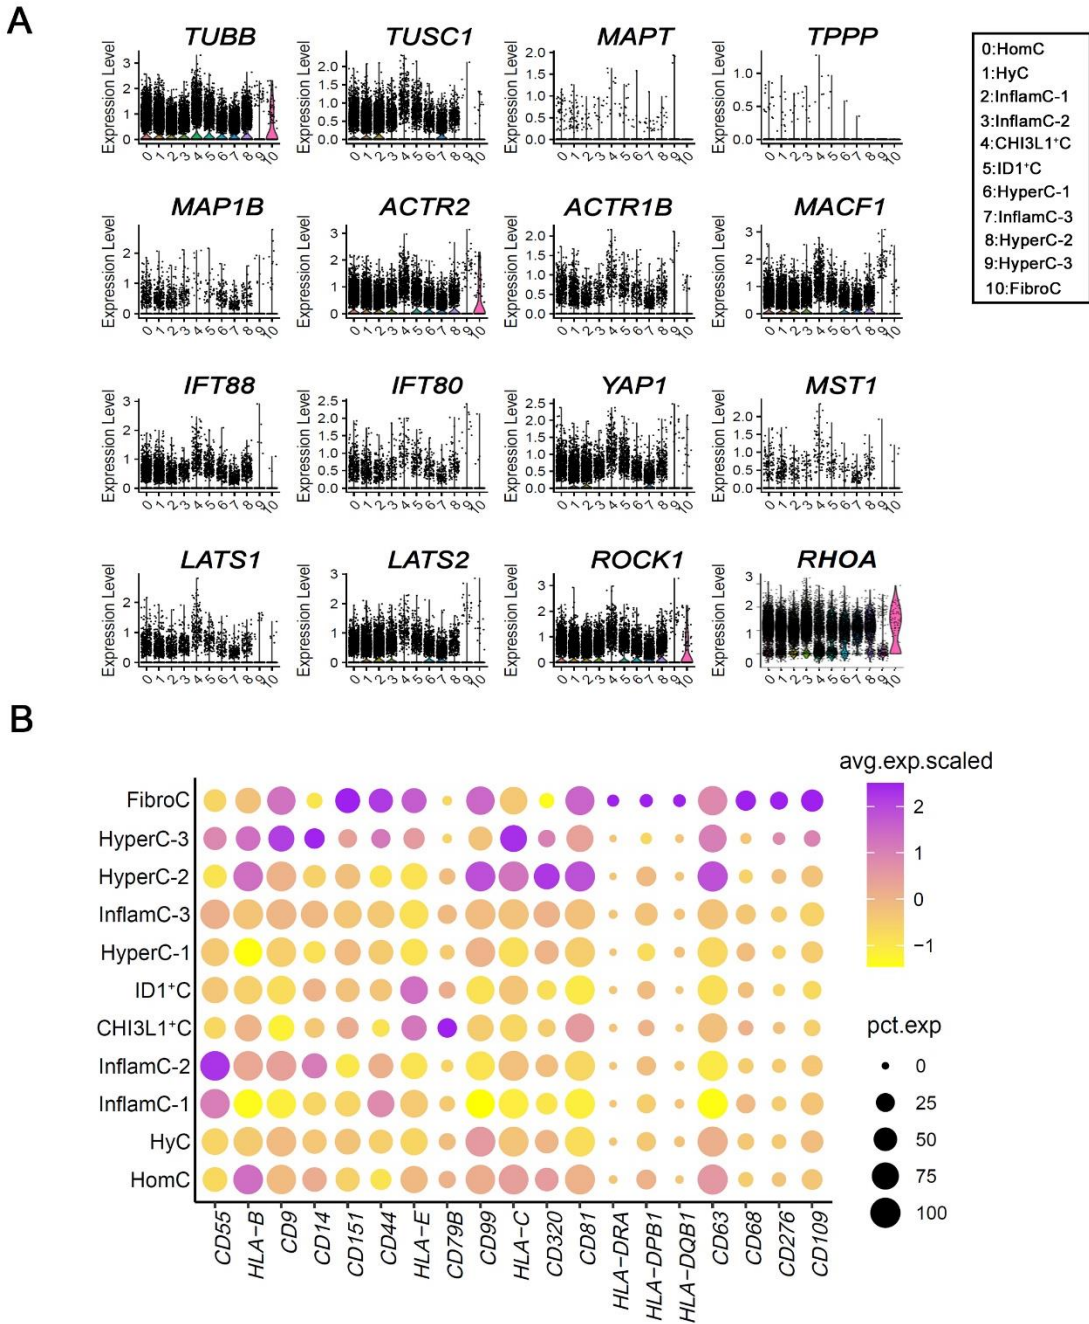

2

3 **Fig S5. The relationship between cytoskeleton with chondrocytes and osteoarthritis**

4 **(A)** Violin plots showing expression levels of the represented MT and actin genes of each CH

5 cluster. **(B)** Dot plots showing the expression of cell surface markers in each clusters.

6

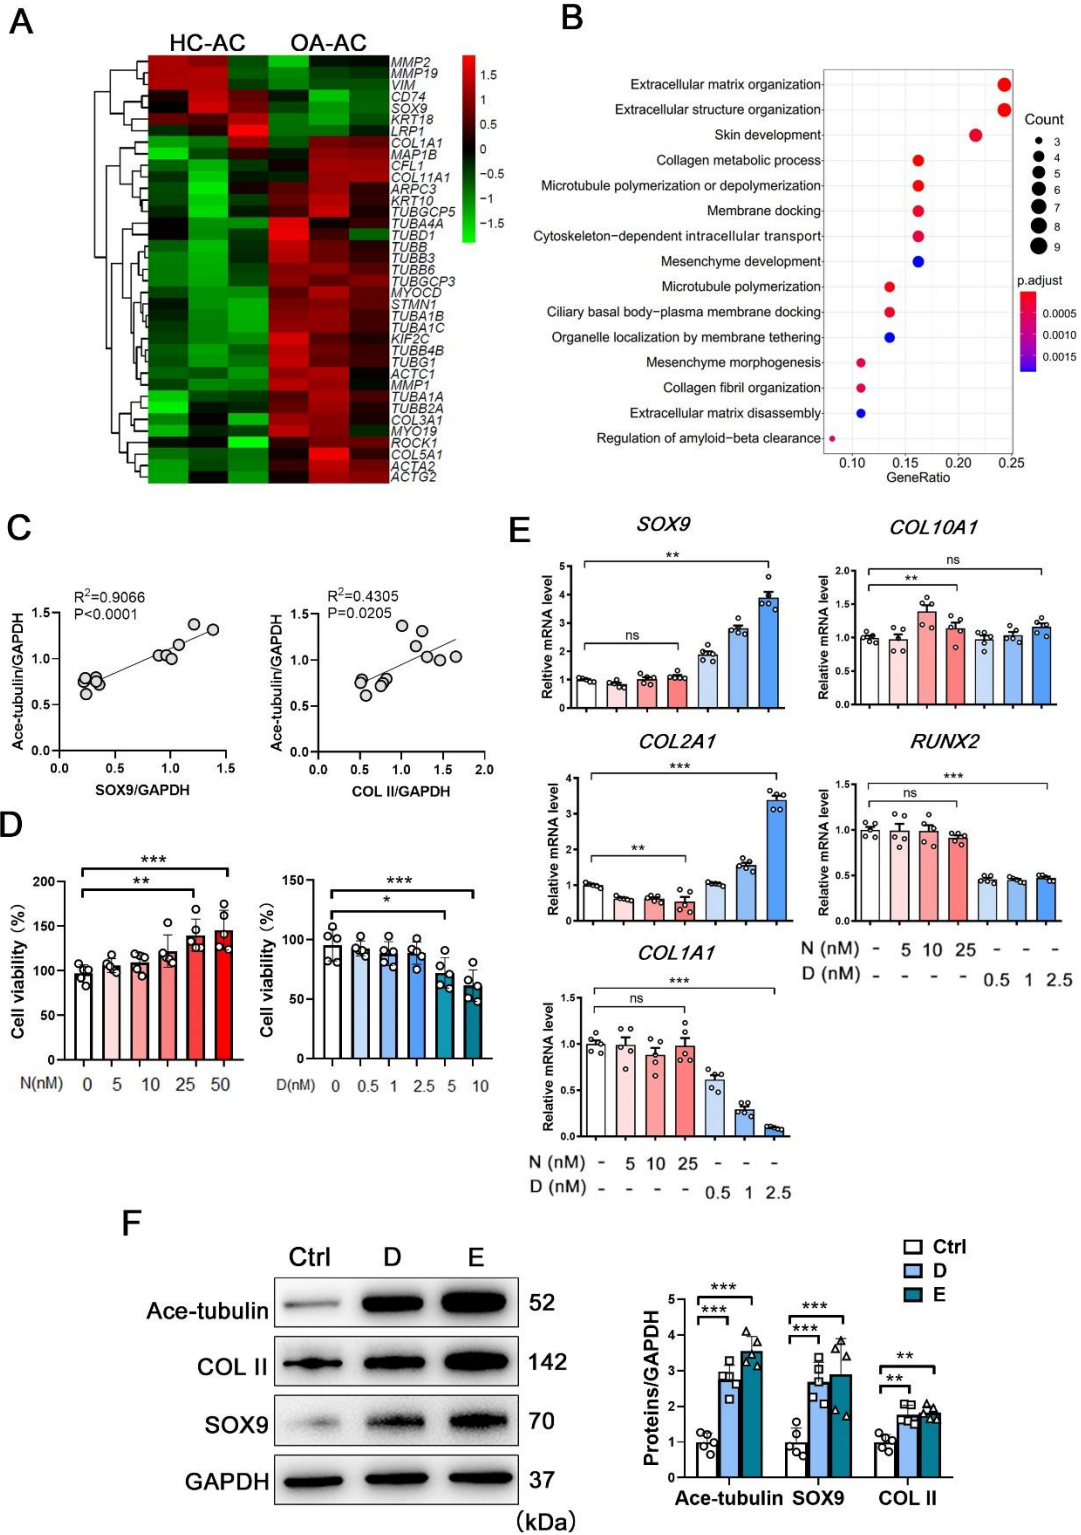

1 **Fig.S6. Public data analysis of cytoskeletal genes and biological process in OA cartilage.**

2 **(A)** Heatmap and **(B)** gene ontology analyses for cytoskeleton-associated genes in articular  
3 cartilage from healthy (Control) and osteoarthritis (OA) donors. **(C)** Relative analysis of the  
4 expression level of Ace-tubulin and SOX9, Ace-tubulin and COL II, respectively. **(D)** CCK8  
5 analysis of the cell viability in chondrocytes (CHs) when treated with the nocodazole (N) and  
6 docetaxel (D) in different concentration, n=5. **(E)** RT-qPCR analyses of *SOX9*, *COL2A1*, *COL1A1*,  
7 *RUNX2*, and *COL10A1* in human CHs treated with nocodazole (N) and docetaxel (D) for 1 week.  
8 n=5. 2.5 nM of docetaxel had significant effects on chondrogenesis in CHs. **(F)** Western blot  
9 analysis of Ace-tubulin, SOX9 and COL II in CHs treated with docetaxel (D) and epothilone (E)  
10 for 1 week. Quantification of western blot data, n=5. Data are represented as the mean  $\pm$  SD.  
11 \*\*P<0.01, \*\*\*P<0.001.

12

13

14

15

16

1 Fig. S7

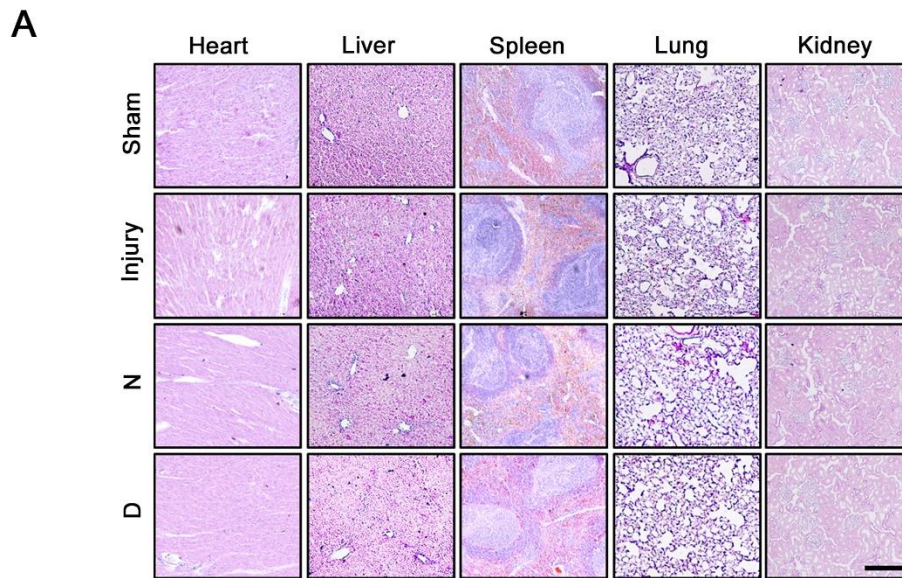

2

3 **Fig S7. The effect of nocodazole (N) and docetaxel (D) *in vivo* and the safety *in vitro***

4 **(C) H&E staining of various tissues other than cartilage from the rat cartilage injury model after**

5 **6-weeks treatment of N and D. There was no side effect in the tissues. Scale bar, 200  $\mu$ m.**

6

7

8

9

10

11

12

13

14

1 Fig.S8

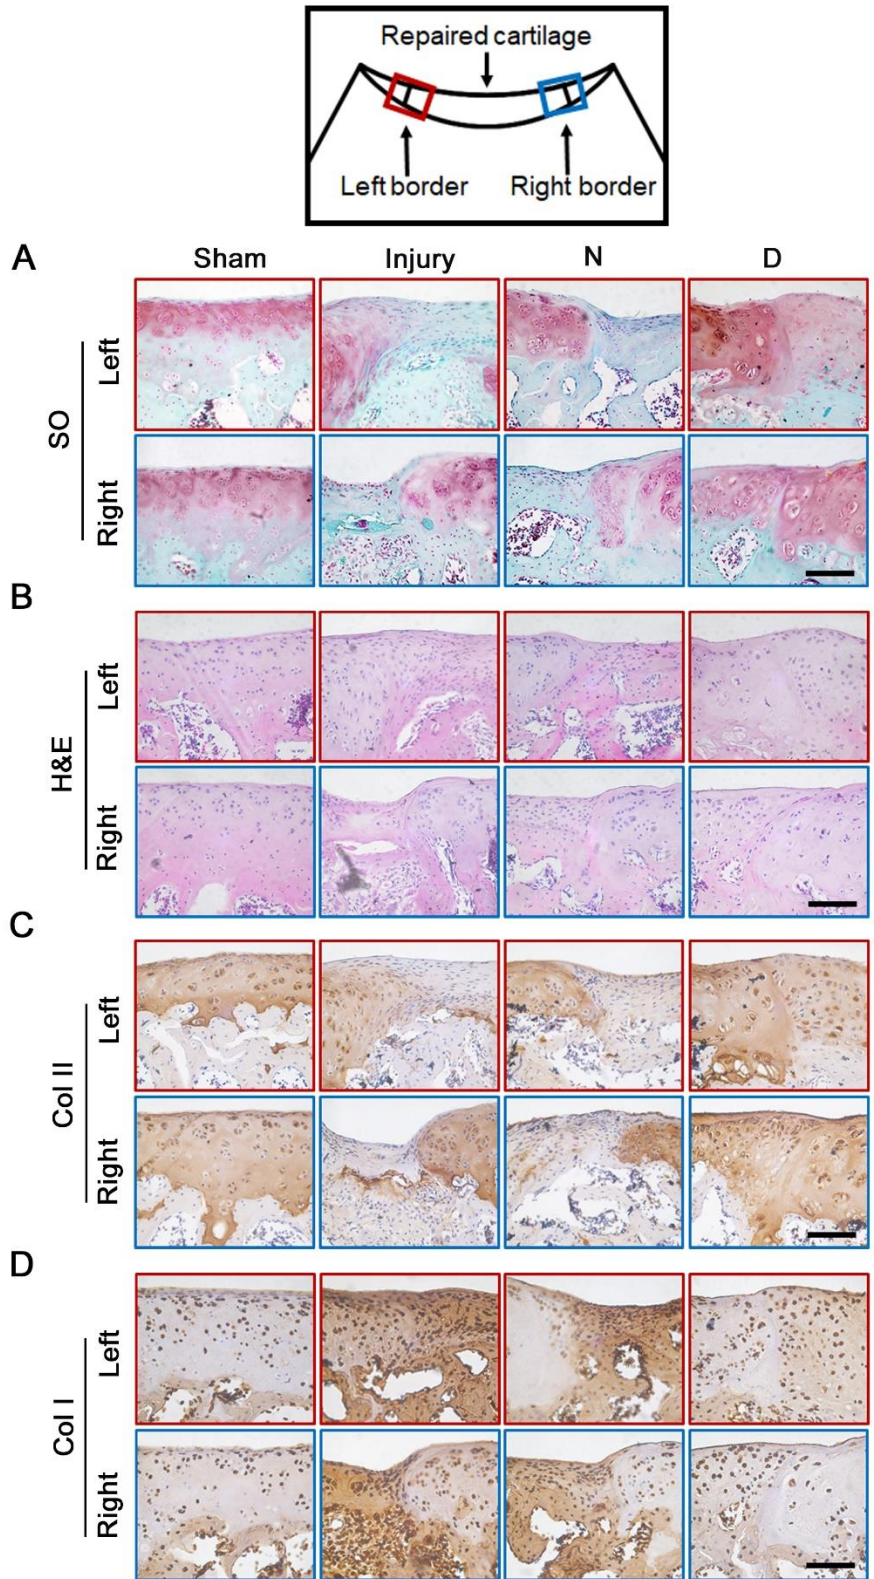

2

1 **Fig S8. Histology of repaired cartilage of the rat cartilage injury model treated with**  
2 **nocodazole (N) and docetaxel (D).**

3 **(A)** H&E staining, **(B)** Safranin O (SO) staining, and immunohistochemical staining for **(C)** type  
4 II collagen (Col II) and **(D)** type I collagen (Col I). The intra-articular injection of docetaxel  
5 improved cartilage repair in the model. The repaired cartilage was similar to the uninjured cartilage  
6 and its boundaries appeared blurred. Scale bar, 100  $\mu\text{m}$ .

7

8

9

10

11

12

13

14

15

16

17

18

19



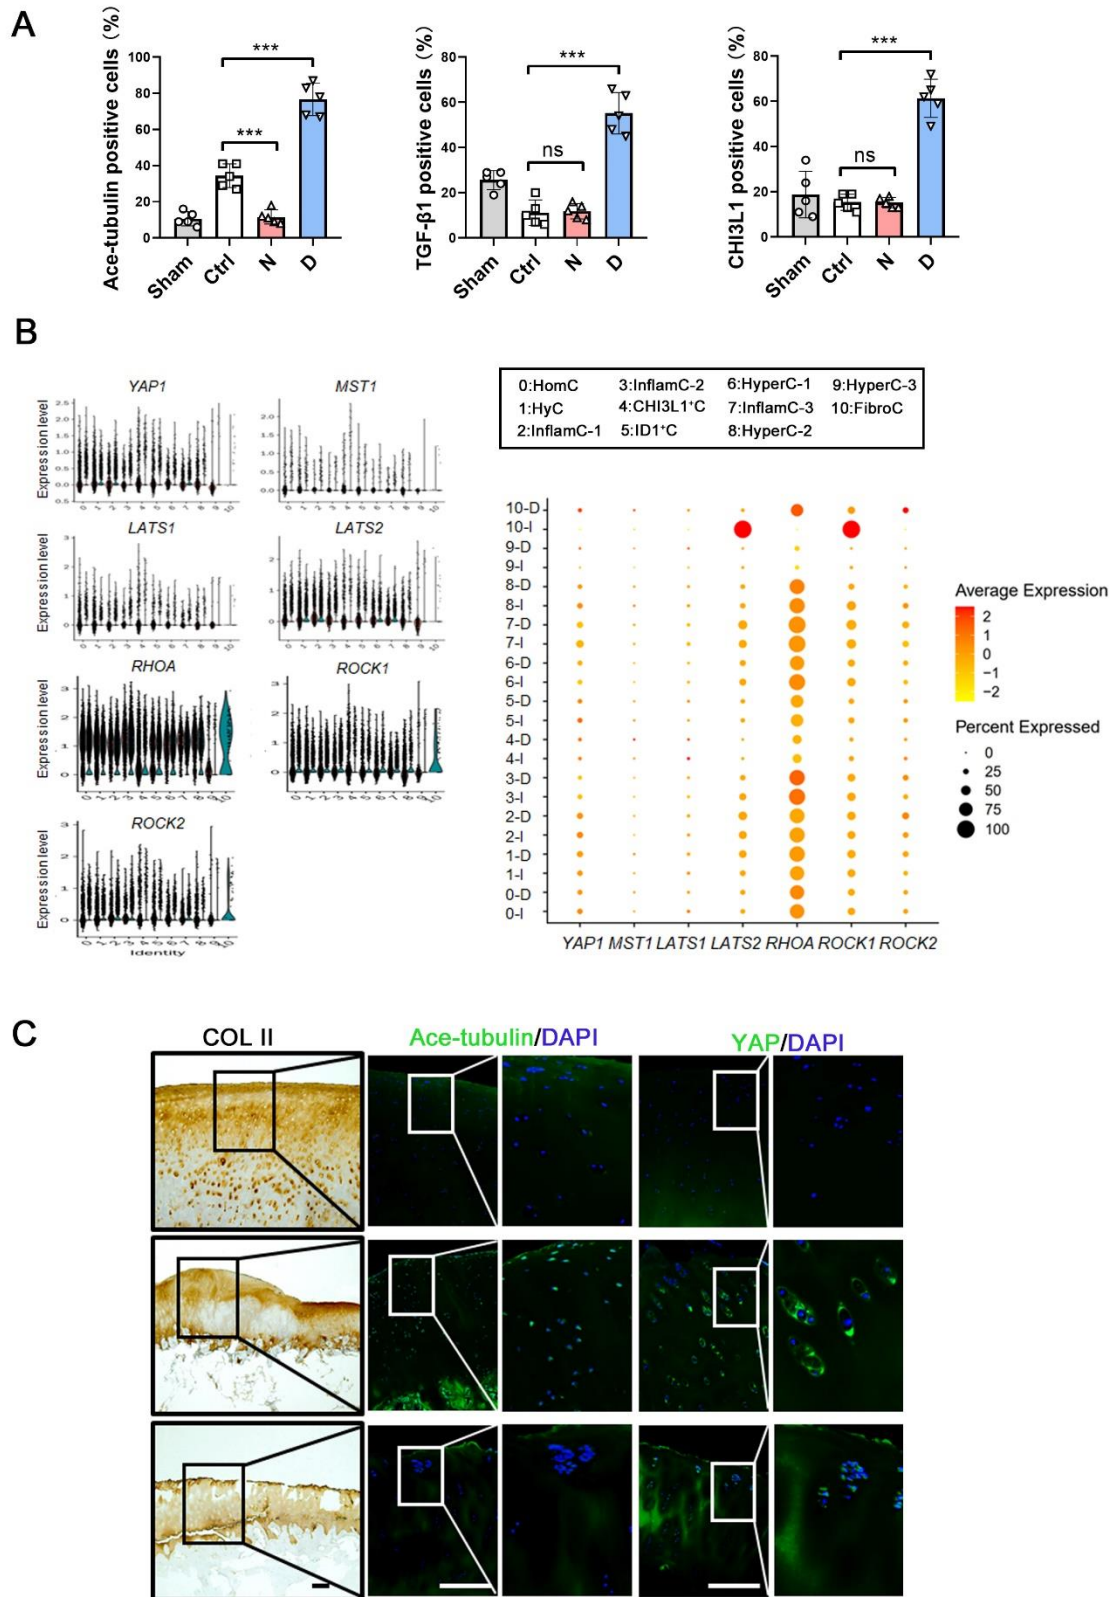

1 **Fig S9. The role of microtubule stabilization to YAP and YAP related signaling.**  
2 **(A)** Quantification of data Fig 4E (left), 4F (middle), and 4G (right).  
3 **(B)** The violin plots and dot plots showing the expression of YAP and YAP related genes in each  
4 subpopulation between intact and damaged cartilage.  
5 **(C)** Immunohistochemical staining for Col II, and immunofluorescence staining for Ace-tubulin  
6 and YAP in the cartilage depicting three different levels of abrasion severity. Scale bar, 200  $\mu$ m.  
7
